# Supplementary material for: Outreach to the Veterans Crisis Line During the COVID-19 Pandemic: A Mixed-Methods Analysis
Source: Atypon-hosted journal article supplement (doi:10.1176/appi.ps.202200044), 2022-09-06
Supplement: appi.ps.202200044.ds001.pdf [file appi.ps.202200044.ds001.pdf]

**Synopsis Notes Broad Codes and Subcodes**

| <b>Broad Codes</b>                                                                                                                                                                                                                                                                                                                                                                                                                                                                          |                                                                                                                                                                                                                                                                                                                                                                                                                                                                                                                                                                                                                                                                                                                                                                                                                                                                                                                                                                                                                                                                                                                                                                                                                                                                                                                                                                                                                                                                                                                                                                                                                                                                                                                                             |                                                                                                                                                                                                                                                                                                                                                                                                                                                                                                                                                                                                                             |
|---------------------------------------------------------------------------------------------------------------------------------------------------------------------------------------------------------------------------------------------------------------------------------------------------------------------------------------------------------------------------------------------------------------------------------------------------------------------------------------------|---------------------------------------------------------------------------------------------------------------------------------------------------------------------------------------------------------------------------------------------------------------------------------------------------------------------------------------------------------------------------------------------------------------------------------------------------------------------------------------------------------------------------------------------------------------------------------------------------------------------------------------------------------------------------------------------------------------------------------------------------------------------------------------------------------------------------------------------------------------------------------------------------------------------------------------------------------------------------------------------------------------------------------------------------------------------------------------------------------------------------------------------------------------------------------------------------------------------------------------------------------------------------------------------------------------------------------------------------------------------------------------------------------------------------------------------------------------------------------------------------------------------------------------------------------------------------------------------------------------------------------------------------------------------------------------------------------------------------------------------|-----------------------------------------------------------------------------------------------------------------------------------------------------------------------------------------------------------------------------------------------------------------------------------------------------------------------------------------------------------------------------------------------------------------------------------------------------------------------------------------------------------------------------------------------------------------------------------------------------------------------------|
| <p style="text-align: center;"><b>COVID-19 (CV-19) Material Stressors</b></p> <p><b>Subcodes:</b></p> <ul style="list-style-type: none"> <li>• <b>Housing concerns</b><br/>Descriptions of housing related issues due to COVID-19 (CV-19).</li> <li>• <b>Job or income/money loss and concerns</b><br/>Descriptions of job or income loss or other financial constraints due to CV-19. Include front line worker issues here. Include shut down incidences that impact finances.</li> </ul> | <p style="text-align: center;"><b>Mental health impacts &amp; disrupted access to resources</b></p> <p><b>Subcodes:</b></p> <ul style="list-style-type: none"> <li>• <b>Medical and Medication access issues</b><br/>Issues related to caller accessing medications or medical appointments for primary, specialty, and mental health services. Include cancellations and service/surgery postponement due to CV-19 restrictions here.</li> <li>• <b>Social support access issues</b><br/>Issues related to caller accessing social support services and support groups. <u>Include non-healthcare community resources such going to the church, gym or park here.</u></li> <li>• <b>Family/relationship/domestic disturbances</b><br/>Callers experiencing stress related to their living situation. This includes family disagreements, relationship issues, &amp; DV references.</li> <li>• <b>CV-19 related loss/Sickness</b><br/>Descriptions of caller stress due to CV-19 related death of friends/family.</li> <li>• <b>Substance use</b><br/>Descriptions of alcohol or drug use increase due to CV-19.</li> <li>• <b>MH/PTSD/Current SI</b><br/>Descriptions of caller feeling triggered due to CV-19 and experiencing mental health anxieties, PTSD, current suicide ideation. <u>Include general COVID anxiety references here.</u></li> <li>• <b>Social Isolation/Quarantine stress</b><br/>Instances where caller mentions feeling social isolation or quarantine related stress</li> <li>• <b>Virus exposure fears/paranoia</b><br/>Descriptions where caller is stressed/fearful of being exposed to CV-19. Include references to non-masking, lack of social distancing, and not wanting to go out/go to doctor</li> </ul> | <p style="text-align: center;"><b>COVID-19 specific concerns or questions (not related to mental health)</b></p> <p><b>Subcodes:</b></p> <ul style="list-style-type: none"> <li>• <b>Info on testing/CV-19 symptomatic</b><br/>Descriptions of caller needing information on testing or being symptomatic for CV-19.</li> <li>• <b>Media/Politics/Controversy</b><br/>Instances where caller discusses CV-19 related to media, politics, or virus origins</li> <li>• <b>General</b><br/>Include general references to CV-19 that do not necessarily relate to any of the previous codes but is relevant content.</li> </ul> |
| <p><b>Notes Category</b></p> <p>Use this category to make notes on the established codes or to discuss newly emerging themes and content that require further attention. Also, provide any suggestions for changes to code categorizations, and other thoughts for consideration here.</p>                                                                                                                                                                                                  |                                                                                                                                                                                                                                                                                                                                                                                                                                                                                                                                                                                                                                                                                                                                                                                                                                                                                                                                                                                                                                                                                                                                                                                                                                                                                                                                                                                                                                                                                                                                                                                                                                                                                                                                             |                                                                                                                                                                                                                                                                                                                                                                                                                                                                                                                                                                                                                             |
